# Supplementary material for: Islet-on-chip: promotion of islet health and functionviaencapsulation within a polymerizable fibrillar collagen scaffold
Source: Royal Society of Chemistry journal article supplement (doi:10.1039/d3lc00371j), 2023-01-01
Supplement: d3lc00371j1.pdf [file d3lc00371j1.pdf]

## Supplementary Materials for

Islet-on-Chip: Promotion of Islet Health and Function via Encapsulation within a  
Polymerizable Fibrillar Collagen Scaffold

Emma L. Vanderlaan, Joshua Sexton, Carmella Evans-Molina, Adrian Buganza Tepole,  
Sherry L. Voytik-Harbin\*

\*Corresponding author

Email address: [harbins@purdue.edu](mailto:harbins@purdue.edu) (Sherry L. Voytik-Harbin)

**Table S1. Summary of Computational Modeling Parameters**

| <b>Geometry</b>                                                                             | <b>Dimension</b>      |                       |                       | <b>Ref.</b> |
|---------------------------------------------------------------------------------------------|-----------------------|-----------------------|-----------------------|-------------|
| Channel Height (mm)                                                                         | 0.5                   |                       |                       |             |
| Channel Length (mm)                                                                         | 35-37                 |                       |                       |             |
| Chamfer Angle (degrees)                                                                     | 45°                   |                       |                       |             |
| Islet Diameter ( $\mu\text{m}$ )                                                            | 150                   |                       |                       | [1]         |
| <b>Transport Parameter</b>                                                                  | <b>Medium</b>         | <b>Collagen</b>       | <b>Islet</b>          | <b>Ref.</b> |
| Porosity                                                                                    | –                     | 0.845                 | 0.1                   | [2,3]       |
| Permeability ( $\text{m}^2$ )                                                               | –                     | $7.5 \times 10^{-13}$ | $1 \times 10^{-15}$   | [3,4]       |
| Diffusion Coefficient of Oxygen ( $\text{m}^2/\text{s}$ )                                   | $3.0 \times 10^{-9}$  | $2.5 \times 10^{-9}$  | $2.0 \times 10^{-9}$  | [1]         |
| Diffusion Coefficient of Glucose ( $\text{m}^2/\text{s}$ )                                  | $0.9 \times 10^{-9}$  | $0.6 \times 10^{-9}$  | $0.3 \times 10^{-9}$  | [1]         |
| Diffusion Coefficient of Insulin ( $\text{m}^2/\text{s}$ )                                  | $0.15 \times 10^{-9}$ | $0.11 \times 10^{-9}$ | $0.05 \times 10^{-9}$ | [1,4]       |
| Maximum Oxygen Consumption Rate ( $\text{mol}/\text{m}^3 \text{ s}$ )                       | –                     | –                     | -0.034                | [1]         |
| Maximum Glucose Consumption Rate ( $\text{mol}/\text{m}^3 \text{ s}$ )                      | –                     | –                     | -0.028                | [1]         |
| Maximum Insulin Secretion Rate, 1 <sup>st</sup> Phase ( $\text{mol}/\text{m}^3 \text{ s}$ ) | –                     | –                     | $21 \times 10^{-5}$   | [1]         |
| Maximum Insulin Secretion Rate, 2 <sup>nd</sup> Phase ( $\text{mol}/\text{m}^3 \text{ s}$ ) | –                     | –                     | $3 \times 10^{-5}$    | [1]         |
| Oxygen Concentration (mM)                                                                   | 0.2                   | –                     | –                     | [1]         |
| Low Glucose Concentration (mM)                                                              | 2.5                   | –                     | –                     |             |
| High Glucose Concentration (mM)                                                             | 15                    | –                     | –                     |             |
| Outlet Pressure (Pa)                                                                        | 0                     | –                     | –                     | [1]         |

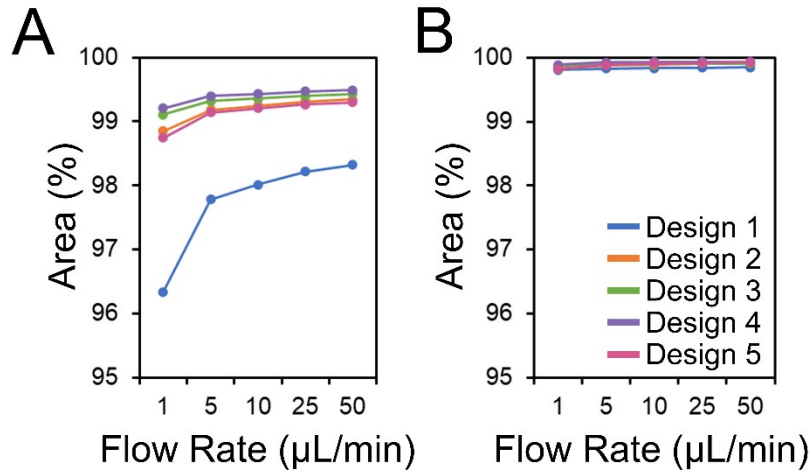

**Figure S1.** Quantification of oxygen concentration within simulated islet-collagen compartments. Percentage of the islet-collagen compartment A) above threshold for *in-vivo* oxygen levels (0.02 mM)<sup>5</sup> and B) above threshold for hypoxia-induced dysfunction (5.1 μM).<sup>5</sup>

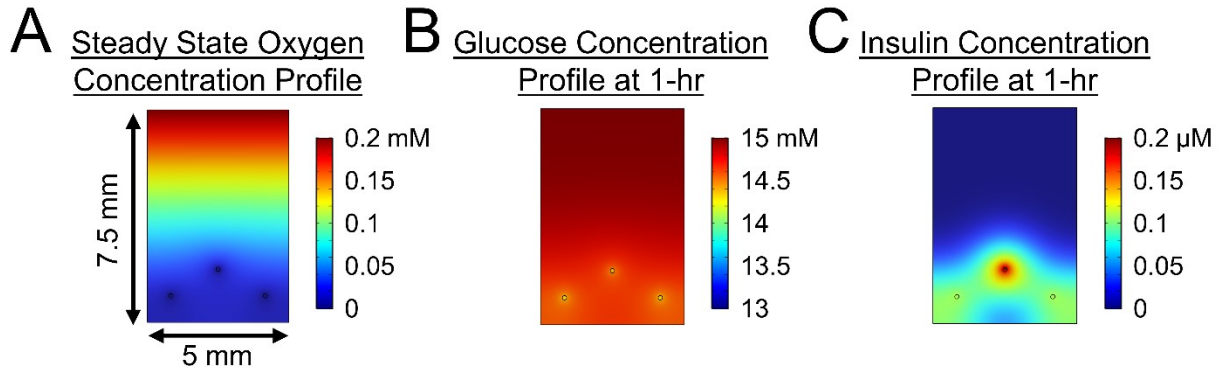

**Figure S2.** Simulation of conventional static suspension culture. Results for simulated suspension culture in 96-well plate, including (A) oxygen concentration profile at steady state; (B) glucose concentration profile at 1-hour time point following initiation of 15 mM glucose incubation; and (C) insulin concentration profile at 1-hour time point following initiation of 15 mM glucose incubation.

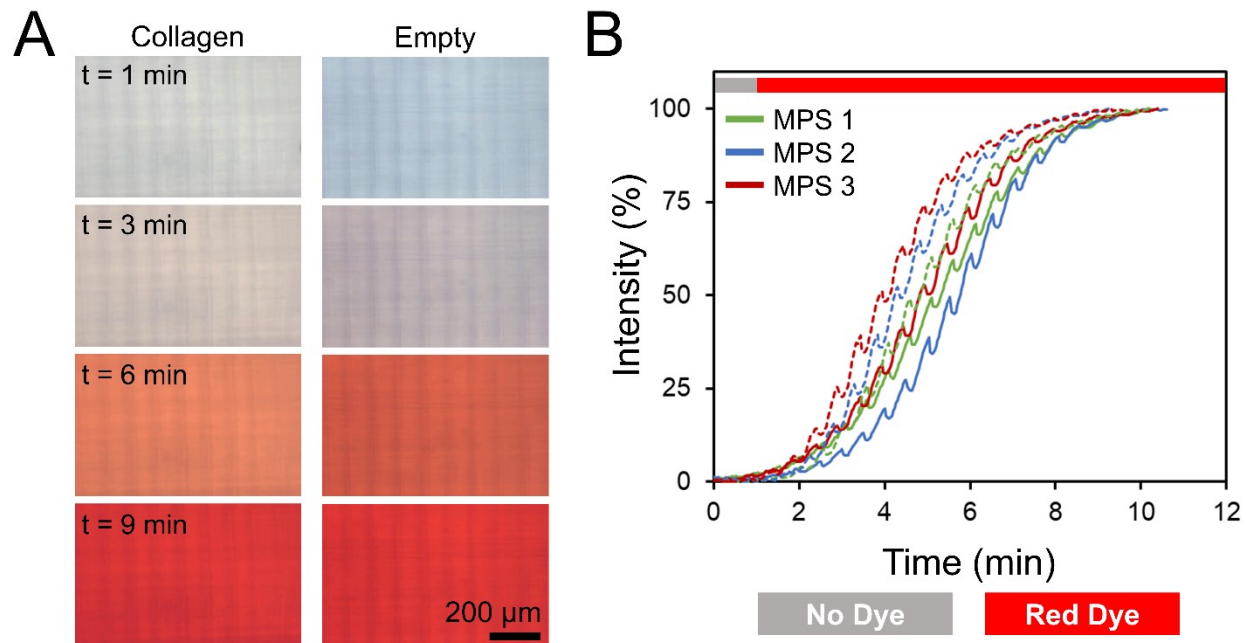

**Figure S3.** Characterization of transport properties within the MPS islet-collagen compartment in the absence and presence of a collagen scaffold. A) Representative brightfield images of the region of interest at 1, 3, 6, and 9 minutes showing the transport of dye over time in the absence or presence of the collagen scaffold. B) Plots show mean intensity of the region of interest over time, with the transition between solution containing no dye and dye occurring at 1 minute. Solutions were perfused at a flow rate of 25  $\mu\text{L}/\text{min}$  and the islet-collagen compartment of the MPS contained 50  $\mu\text{L}$  collagen (solid line) or was left unfilled (dashed line).

## References

1. P. Buchwald, *Theor. Biol. Med. Model.*, 2011, **8**, 20.
2. S. Park, C. Whittington, S. L. Voytik-Harbin and B. Han, *J. Biomech. Eng.*, 2015, **137**.
3. A. L. Gliberman, B. D. Pope, J. F. Zimmerman, Q. Liu, J. P. Ferrier, J. H. R. Kenty, A. M. Schrell, N. Mukhitov, K. L. Shores, A. B. Tepole, D. A. Melton, M. G. Roper and K. K. Parker, *Lab Chip*, 2019, **19**, 2993-3010.
4. C. F. Whittington, E. Brandner, K. Y. Teo, B. Han, E. Nauman and S. L. Voytik-Harbin, *Microsc. Microanal.*, 2013, **19**, 1323.
5. S. Patel, M. Ishahak, D. Chaimov, A. Velraj, D. LaShoto, D. Hagan, P. Buchwald, E. Phelps, A. Agarwal and C. Stabler, *Sci. Adv.*, 2021, **7**, eaba5515.
